# Supplementary material for: A new sensing platform based on a ternary nanocomposite of graphitic carbon nitride–silver sulfide–nickel molybdate for quercetin determination
Source: Royal Society of Chemistry journal article supplement (doi:10.1039/d3an00244f), 2023-01-01
Supplement: d3an00244f1.pdf [file d3an00244f1.pdf]

## Supplementary Information

### **A new sensing platform based on a ternary nanocomposite of graphitic carbon nitride-silver sulfide-nickel molybdate for quercetin determination**

Khadija Valiyeva<sup>a,b</sup>, Salih Zeki Bas<sup>b,\*</sup>, Keziban Atacan<sup>c</sup>, Adem Sarilmaz<sup>d</sup>, Faruk Ozel<sup>d</sup>,  
Mustafa Ozmen<sup>b</sup>

---

<sup>a</sup>Department of Nanotechnology and Advanced Materials, Selcuk University, 42130, Konya, Turkey.

<sup>b</sup>Department of Chemistry, Science Faculty, Selcuk University, 42130, Konya, Turkey.

<sup>c</sup>Akyazi Vocational School of Health Services, Sakarya University of Applied Sciences, 54400, Sakarya, Turkey.

<sup>d</sup>Department of Metallurgical and Materials Engineering, Karamanoglu Mehmetbey University, 70200, Karaman, Turkey.

\*Corresponding author: [salihzekibas@gmail.com](mailto:salihzekibas@gmail.com)

†Electronic supplementary information (ESI) available: FT-IR, Raman, XRD analysis of Ag<sub>2</sub>S-NiMoO<sub>4</sub>-g-C<sub>3</sub>N<sub>4</sub> composite, DPVs of Que + interfering substances at Ag<sub>2</sub>S-NiMoO<sub>4</sub>-g-C<sub>3</sub>N<sub>4</sub>/SPE.



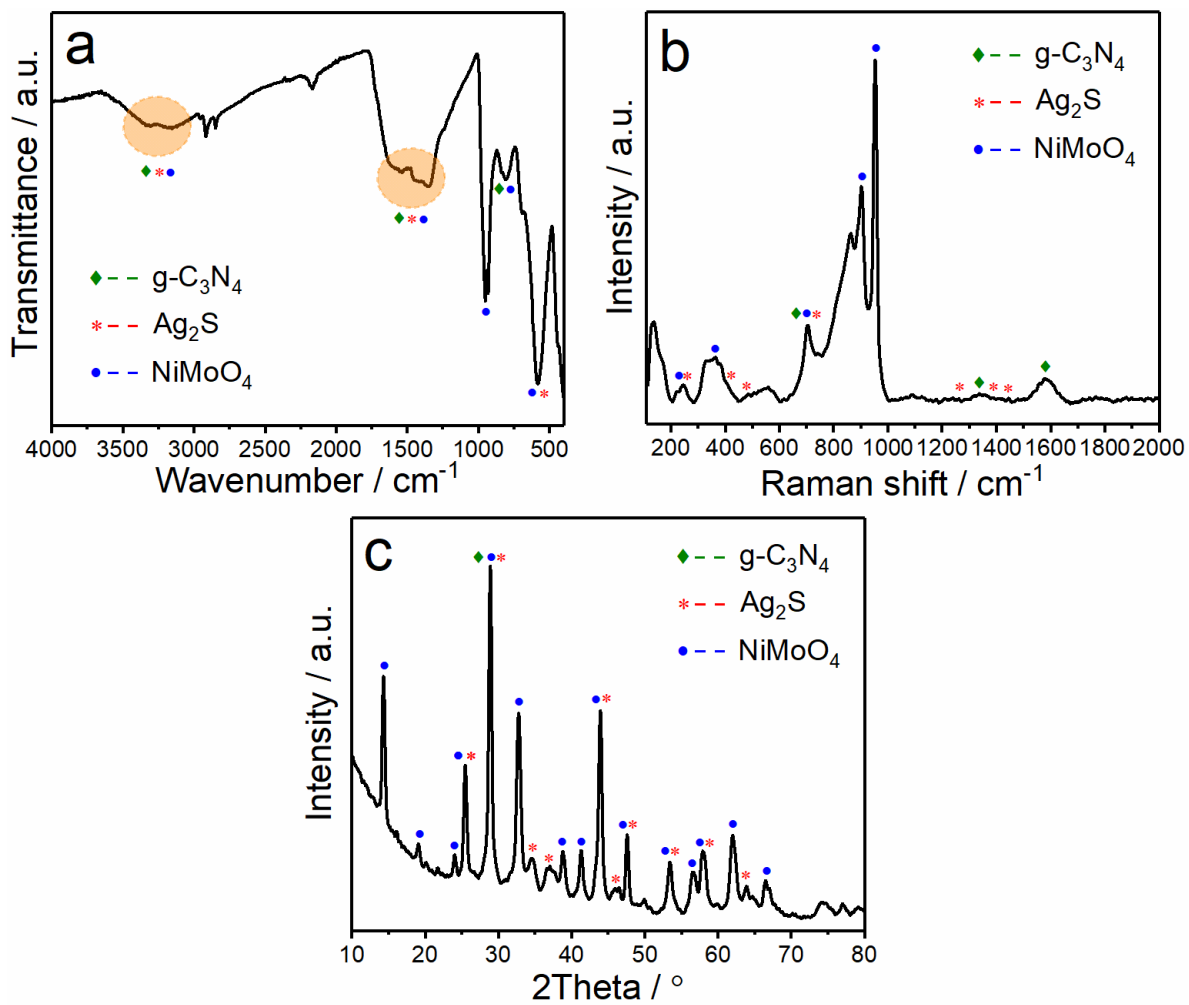

**Fig. S1.** FT-IR (a), Raman (b), and XRD (c) analysis of  $\text{Ag}_2\text{S-NiMoO}_4\text{-g-C}_3\text{N}_4$  composite.

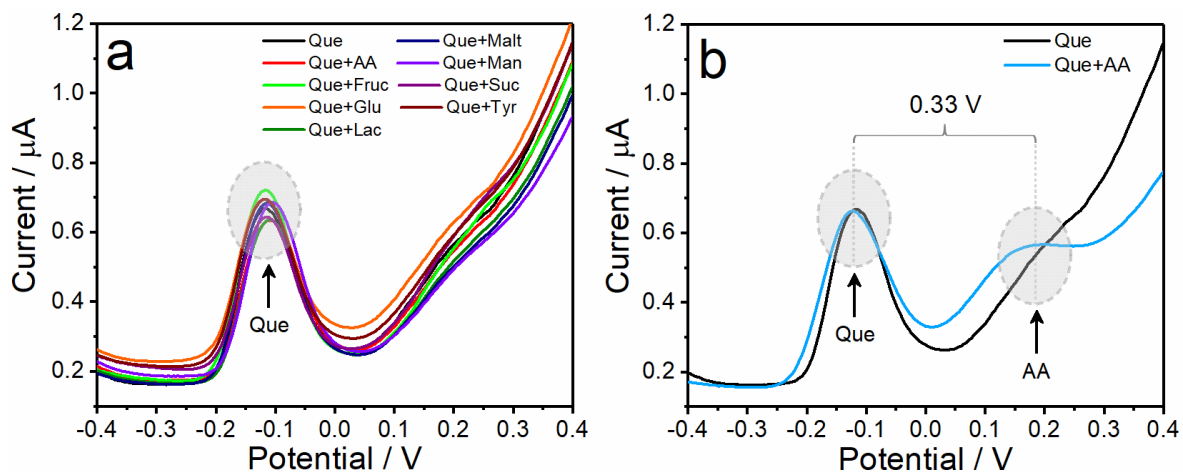

**Fig. S2.** (a) DPVs of  $\text{Ag}_2\text{S-NiMoO}_4\text{-g-C}_3\text{N}_4/\text{SPE}$  in the presence of only 5  $\mu\text{M}$  Que and 5  $\mu\text{M}$  Que + 100  $\mu\text{M}$  interfering substances (CA, Fruc, Glu, Lac, Malt, Man, Suc, and Tyr). (b) DPVs of  $\text{Ag}_2\text{S-NiMoO}_4\text{-g-C}_3\text{N}_4/\text{SPE}$  in the presence of only 5  $\mu\text{M}$  Que and Que 5  $\mu\text{M}$  Que + 100  $\mu\text{M}$  AA.
